# Supplementary material for: Chemically robust solution-processed indium zinc oxide thin film transistors fabricated by back channel wet-etched Mo electrodes
Source: Royal Society of Chemistry journal article supplement (doi:10.1039/c6ra09684k), 2016-01-01
Supplement: c6ra09684k1.pdf [file c6ra09684k1.pdf]

## Supporting Information for :

# Chemically robust solution-processed indium zinc oxide thin film transistors fabricated by back channel wet-etched Mo electrodes

Da Eun Kim,<sup>‡</sup> Sung Woon Cho,<sup>‡</sup> Bora Kim, Jae Hui Shin, Won Jun Kang, Myeong Gu  
Yun, Seung Ki Beak, Hyung Koun Cho\*, Yong-Hoon Kim, and Yunseok Kim

School of Advanced Materials Science and Engineering, Sungkyunkwan University, 300  
Cheoncheon-dong, Jangan-gu, Suwon, Gyeonggi-do, 440-746, Republic of Korea

\*E-mail: [chohk@skku.edu](mailto:chohk@skku.edu); Tel.: +82 31 290 7364; Fax: +82 31 290 7410.

<sup>‡</sup>These authors contributed equally.

## Soft-bake Double Layer (SDL 1h)

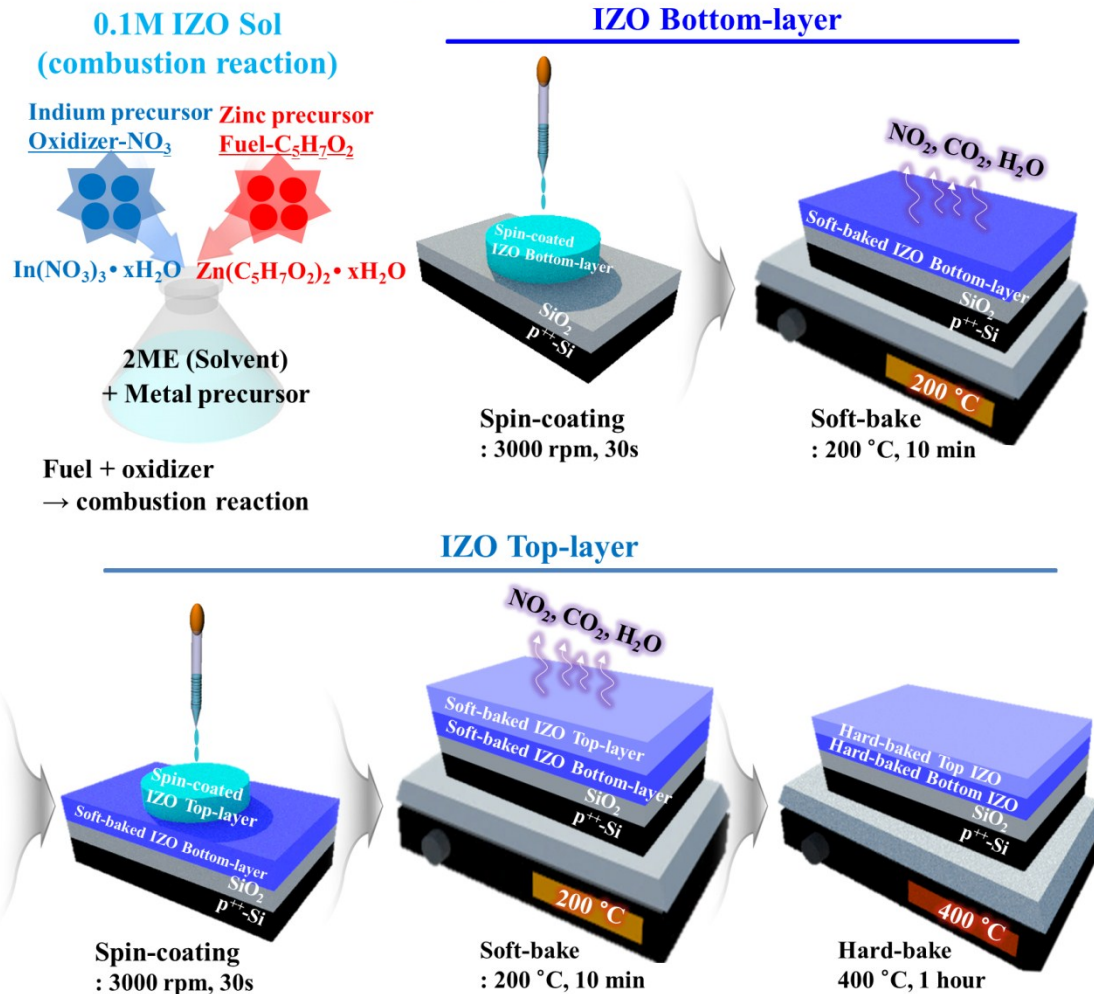

**Fig. S1.** Overall synthesis procedure for three types of solution-processed indium zinc oxide films controlling the stacking process and condensation reaction time: SDL 1h.

## Hard-bake Double Layer (HDL) 1h+1h & 3h+3h

### IZO Bottom-layer

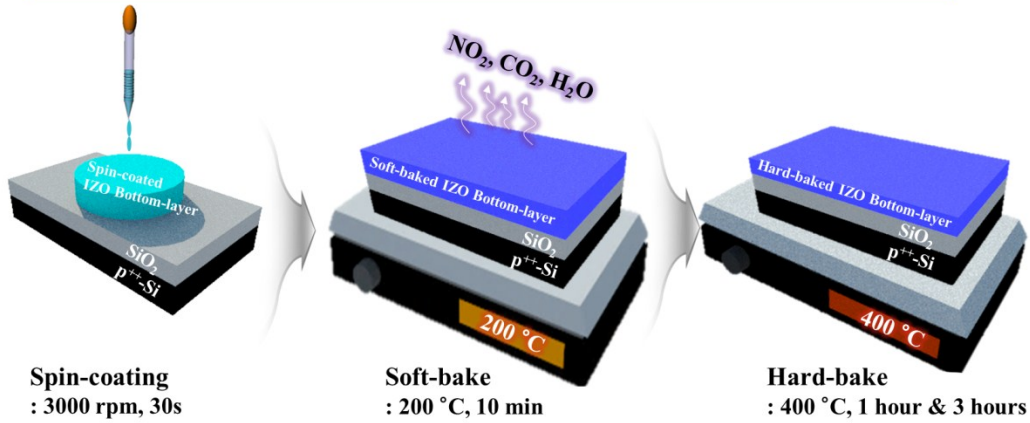

### IZO Top-layer

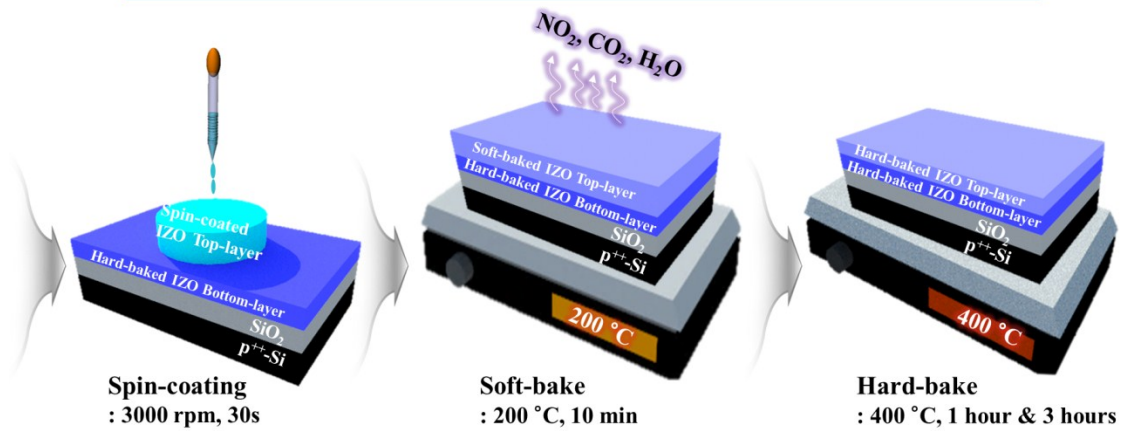

**Fig. S2.** Overall synthesis procedure for three types of solution-processed indium zinc oxide films controlling the stacking process and condensation reaction time: HDL 1h+1h, and HDL 3h+3h.

### IZO(4:6) HDL 3h+3h

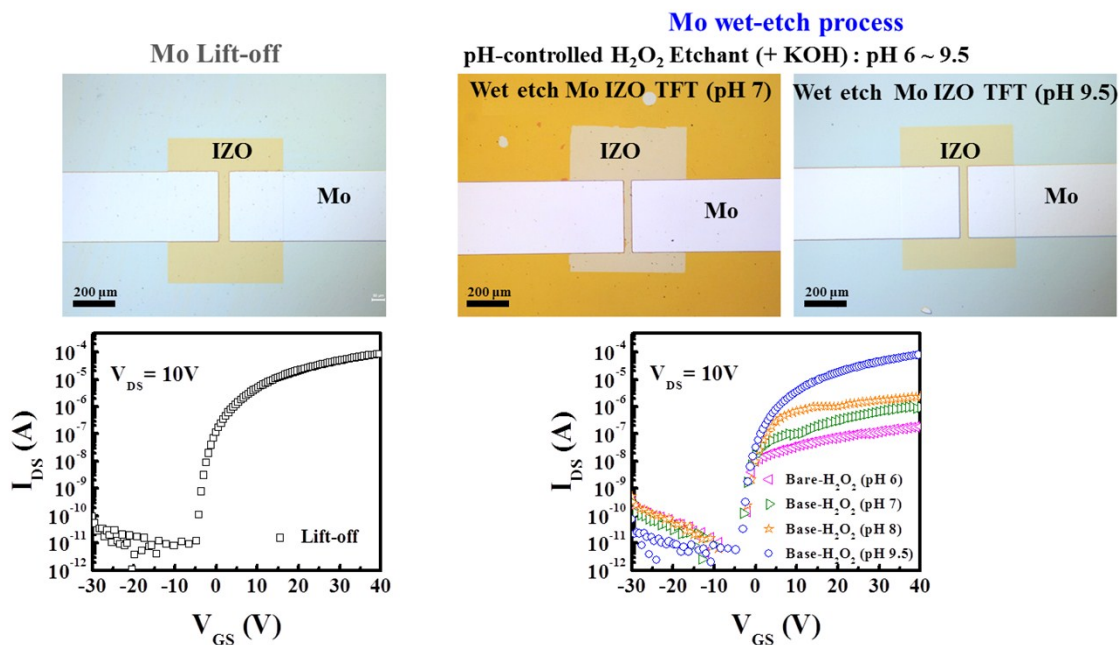

**Fig. S3.** Transfer curves and surface optical microscopy images of solution-processed indium zinc oxide (HDL 3h+3h) thin film transistors prepared with (a) lift-off and (a) wet-etched Mo source/drain electrodes (pH 6-9.5).

Solution:  $\text{H}_2\text{O}_2$  based etchant (pH 9.5)  
Applied Voltage: - 0.194 V  
Reference electrode: Silver-Silver Chloride (+ 0.194 V)  
Sample: IZO, ZnO,  $\text{In}_2\text{O}_3$  (15nm) /  $\text{SiO}_2$  /  $\text{p}^{++}\text{-Si}$   
Measured under dark conditions.

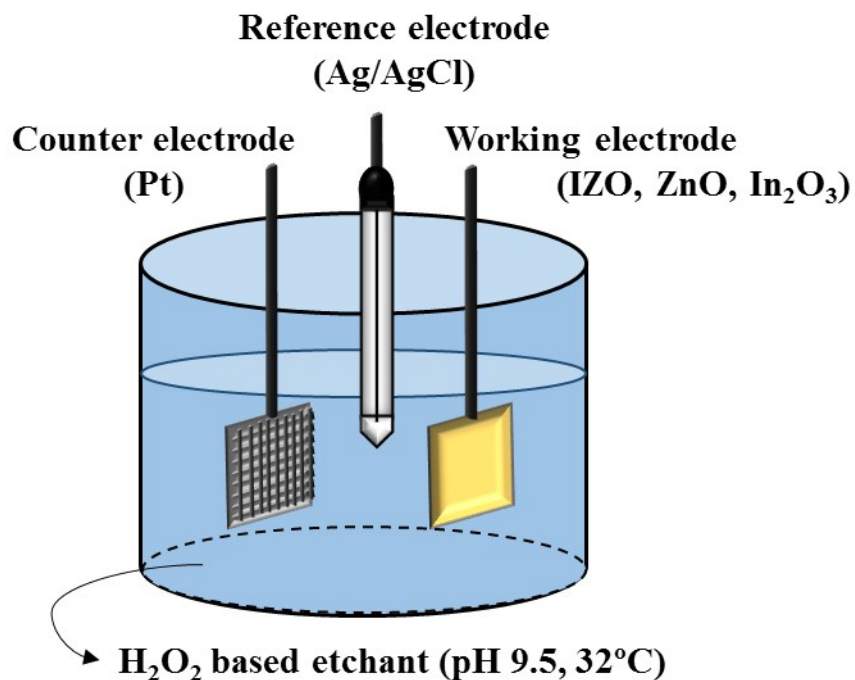

**Fig. S4.** Electrochemical dissolution system for monitoring the etching behavior of solution-processed indium zinc oxide, ZnO, and  $\text{In}_2\text{O}_3$  films in the  $\text{H}_2\text{O}_2$  based wet-etchant (pH 9.5).

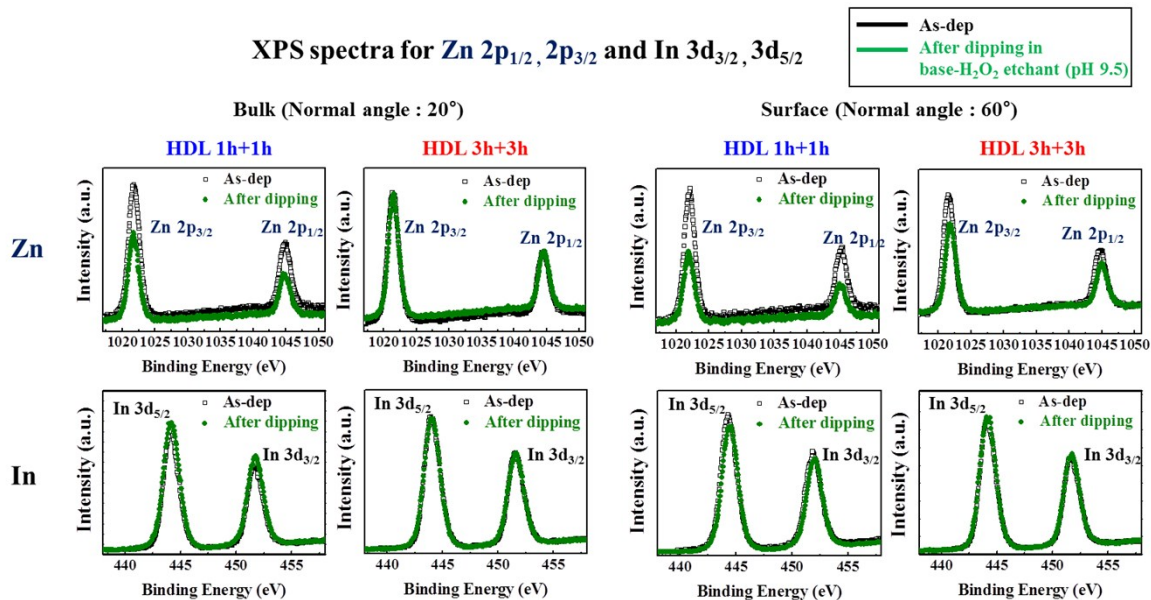

**Fig. S5.** In 3d and Zn 2p angle resolved X-ray photoelectron spectrum from the surface and bulk regions for solution-processed indium zinc oxide thin films (HDL 1h+1h and HDL 3h+3h) before and after dipping in the H<sub>2</sub>O<sub>2</sub>-based wet-etchant for 30 s (pH 9.5).

# XPS spectra for O 1s

## HDL 1h+1h

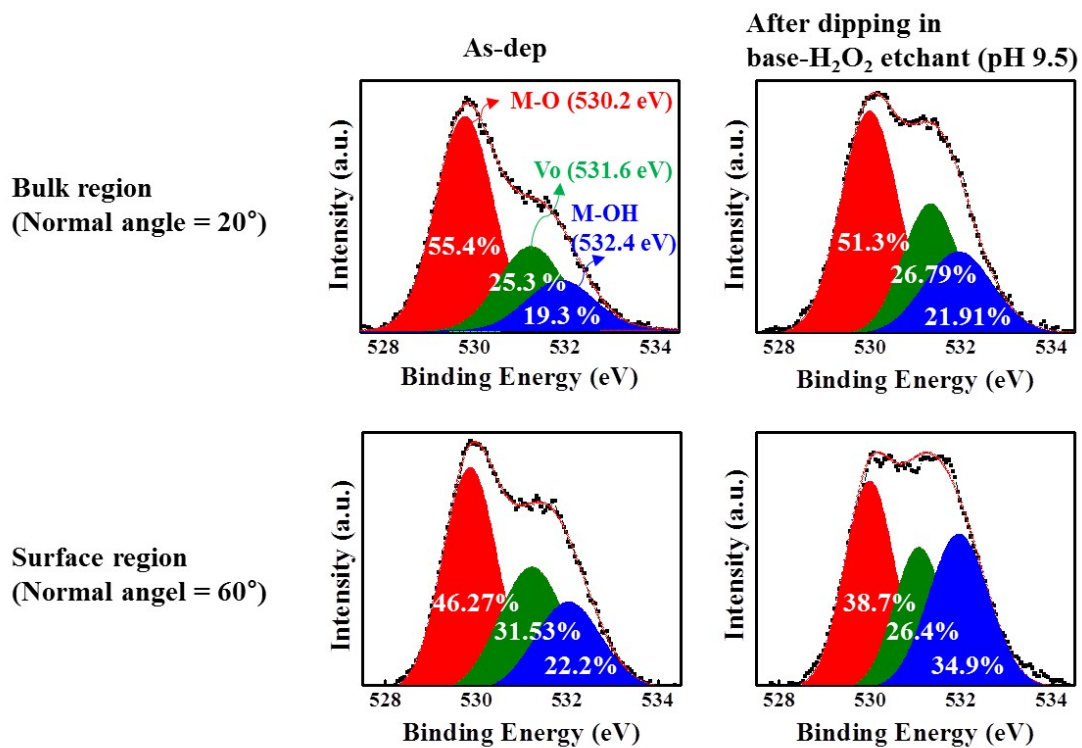

**Fig. S6.** O 1s peak angle resolved X-ray photoelectron spectrum from the surface and bulk regions for solution-processed indium zinc oxide thin films (HDL 1h+1h) before and after dipping in the H<sub>2</sub>O<sub>2</sub> based wet-etchant for 30 s (pH 9.5).



# XPS spectra for O 1s

## HDL 3h+3h

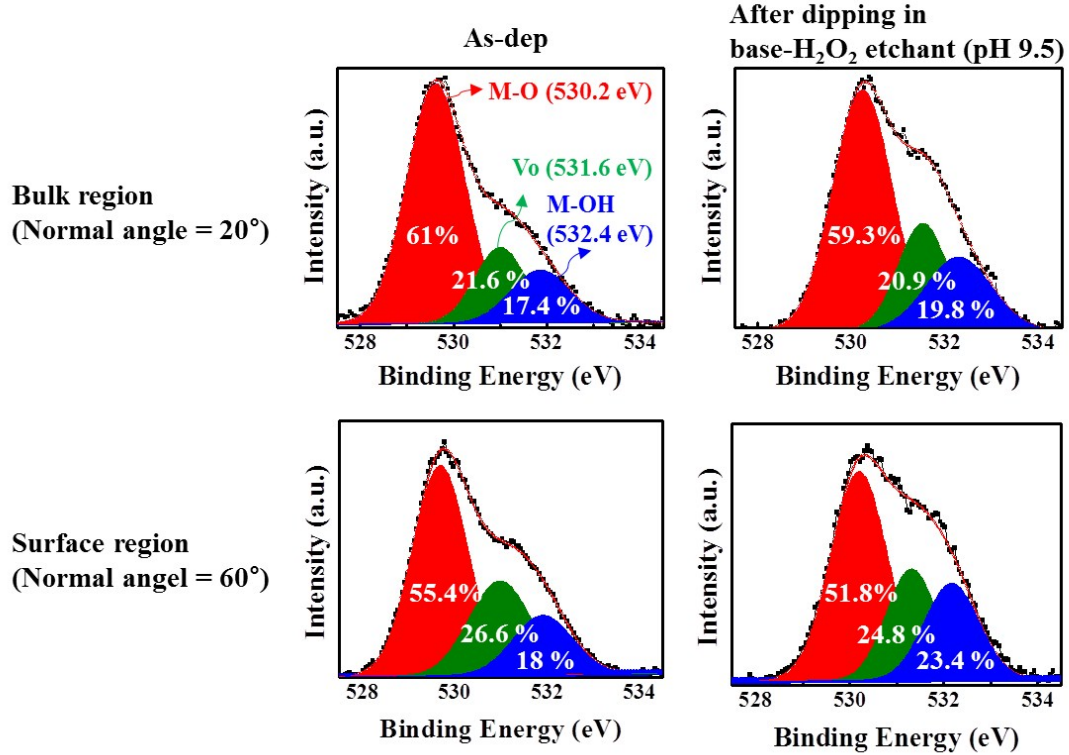

**Fig. S7.** O 1s peak angle resolve X-ray photoelectron spectrum from the surface and bulk regions for solution-processed indium zinc oxide thin films (HDL 3h+3h) before and after dipping in the H<sub>2</sub>O<sub>2</sub> based wet-etchant for 30 s (pH 9.5).



### Mo wet etching Process

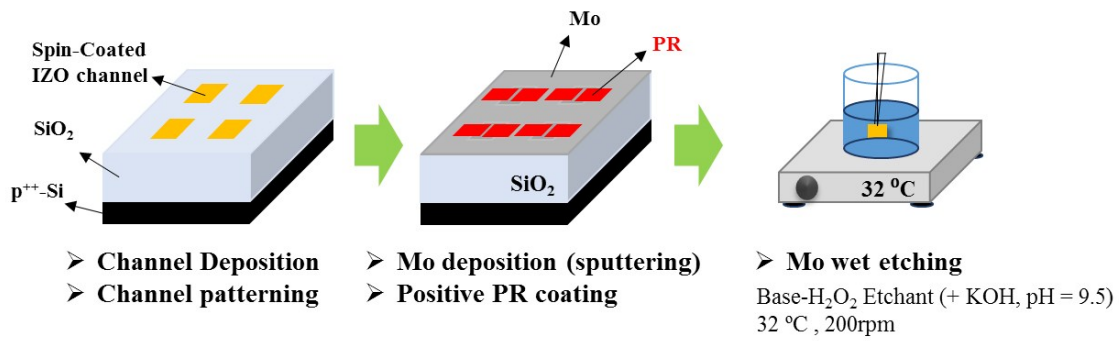

### Mo Lift-off Process

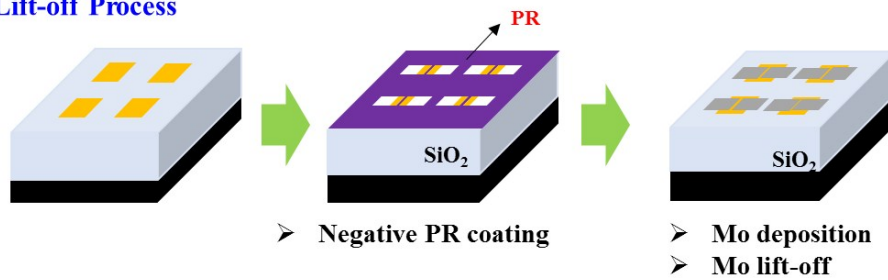

**Fig. S8.** Wet-etching using the base H<sub>2</sub>O<sub>2</sub> wet-etchant (pH 9.5) and lift-off process of Mo source/drain electrodes for solution-processed indium zinc oxide thin film transistors.
